# Supplementary material
Source: Research Square preprint supplement (doi:10.21203/rs.3.rs-10371123/v1)
Supplement: Supplementary file 1 [file c9b88119b7ed048a41932147.docx]

**Table S1. Electronic database search strings used in this scoping review (2015 to present)**

| Database | Concept Block | Search String | Filters Applied | n |
| --- | --- | --- | --- | --- |
| PubMed / MEDLINE (NCBI) | Block 1 Population | ("clear aligner"[tiab] OR "clear aligners"[tiab] OR "Invisalign"[tiab] OR "thermoplastic aligner"[tiab] OR "removable aligner"[tiab] OR "ClearCorrect"[tiab] OR "SureSmile"[tiab] OR "Spark aligner"[tiab] OR "aligner therapy"[tiab] OR "aligner treatment"[tiab] OR "interproximal reduction"[tiab] OR "IPR"[tiab]) | Language: English Year: 2015 to present Humans only |  |
|  | Block 2 Intervention | ("artificial intelligence"[tiab] OR "machine learning"[tiab] OR "deep learning"[tiab] OR "neural network"[tiab] OR "convolutional neural network"[tiab] OR "CNN"[tiab] OR "automated planning"[tiab] OR "AI-assisted"[tiab] OR "AI-driven"[tiab] OR "tooth segmentation"[tiab] OR "digital setup"[tiab] OR "virtual setup"[tiab] OR "ClinCheck"[tiab] OR "algorithm"[tiab]) |  |  |
|  | Block 3 Outcome | ("accuracy"[tiab] OR "predictability"[tiab] OR "precision"[tiab] OR "discrepancy"[tiab] OR "mean absolute error"[tiab] OR "MAE"[tiab] OR "simulation accuracy"[tiab] OR "mesiodistal width"[tiab] OR "enamel reduction"[tiab] OR "treatment outcome"[tiab]) |  |  |
|  | COMBINED | Block 1 AND Block 2 AND Block 3 |  | 24 |
| Scopus (Elsevier) | Block 1 Population | TITLE-ABS-KEY ( "clear aligner" OR "clear aligners" OR "Invisalign" OR "thermoplastic aligner" OR "removable aligner" OR "ClearCorrect" OR "SureSmile" OR "Spark aligner" OR "aligner therapy" OR "aligner treatment" OR "interproximal reduction" OR "IPR" ) | Language: English Year: 2015 to present Document types: Article, Review |  |
|  | Block 2 Intervention | TITLE-ABS-KEY ( "artificial intelligence" OR "machine learning" OR "deep learning" OR "neural network" OR "convolutional neural network" OR "CNN" OR "automated planning" OR "AI-assisted" OR "AI-driven" OR "tooth segmentation" OR "digital setup" OR "virtual setup" OR "ClinCheck" OR "algorithm" ) |  |  |
|  | Block 3 Outcome | TITLE-ABS-KEY ( "accuracy" OR "predictability" OR "precision" OR "discrepancy" OR "mean absolute error" OR "MAE" OR "simulation accuracy" OR "mesiodistal width" OR "enamel reduction" OR "treatment outcome" ) |  |  |
|  | COMBINED | Block 1 AND Block 2 AND Block 3 |  | 55 |
| Web of Science (Clarivate) | Block 1 Population | TS=("clear aligner" OR "clear aligners" OR "Invisalign" OR "thermoplastic aligner" OR "removable aligner" OR "ClearCorrect" OR "SureSmile" OR "Spark aligner" OR "aligner therapy" OR "aligner treatment" OR "interproximal reduction" OR "IPR") | Language: English Year: 2015 to present Web of Science Core Collection |  |
|  | Block 2 Intervention | TS=("artificial intelligence" OR "machine learning" OR "deep learning" OR "neural network" OR "convolutional neural network" OR "CNN" OR "automated planning" OR "AI-assisted" OR "AI-driven" OR "tooth segmentation" OR "digital setup" OR "virtual setup" OR "ClinCheck" OR "algorithm") |  |  |
|  | Block 3 Outcome | TS=("accuracy" OR "predictability" OR "precision" OR "discrepancy" OR "mean absolute error" OR "MAE" OR "simulation accuracy" OR "mesiodistal width" OR "enamel reduction" OR "treatment outcome") |  |  |
|  | COMBINED | Block 1 AND Block 2 AND Block 3 |  | 13 |
